# Supplementary material for: Binding Properties and Stability of the Ras-Association Domain of Rap1-GTP Interacting Adapter Molecule (RIAM)
Source: PubMed Central journal article supplement (PMC3327698; doi:10.1371/journal.pone.0031955), 2012-04-16
Supplement: pone.0031955.s001.pdf [file pone.0031955.s001.pdf]

**A****Sequence data:**

riam 1-261

Intensity Coverage: 46.2 % (80764 cnts)  
Sequence Coverage MS/MS: 0.0%Sequence Coverage MS: 24.0%  
pI (isoelectric point): 4.1

|            |            |            |            |            |            |            |            |            |            |            |
|------------|------------|------------|------------|------------|------------|------------|------------|------------|------------|------------|
| 10         | 20         | 30         | 40         | 50         | 60         | 70         | 80         | 90         | 100        | 110        |
| GAMGESSEDI | DQMFSTLLGE | MDLLTQSLGV | DTLPPDPNP  | PRAEFNYSVG | FKDLNESLNA | LEDQDLALM  | ADLVADISEA | EQRTIQAQKE | SLQNQHHSAS | LQASIFSGAA |
| 120        | 130        | 140        | 150        | 160        | 170        | 180        | 190        | 200        | 210        | 220        |
| SLGYGTNVAA | TGISQYEDDL | PPPPADPVL  | LPLPPPPPEP | LSQEEEAQA  | KADKIKLLE  | KLKEAKVKRL | VVKVHMNDNS | TKSLMVDERO | LARDVLDNLF | EKTHCDNV   |
| 230        | 240        | 250        | 260        | 270        |            |            |            |            |            |            |
| WCLYEIPEL  | QIERFFEDHE | NVVEVLSDW  | RDENKILFL  | EKE        |            |            |            |            |            |            |

riam 1-261

MW:29503.480

GAMGESSEDIQMFSTLLGEMDLLTQSLGVDTLPPDPNPRAEFNYSVGFKDLNESLNALEDQDLALMADLVADISEAEQRTIQAQKESLQNQHHSASLQASIFSGAASLGYGTNVAAATGISQYEDDLPPPPADPVLDPPLPPPPPEPLSQEEEAQAQADKIKLLEKLEAKVKRLVVKVHMNDNSTKSLMVDERQLARDVLDNLFERKTHCDNVWCLYEIPELQIERFFEDHENVEVLSDWTRDENKILFLEKE

Mass Search Matches

Search Parameter: MS Tol.:150.00000 ppm, MSMS Tol.:0.500000 Da, Trypsin Specific cleavages only Sequence Editor

Modifications: Optional: Oxidation (M)

| Tree hierarchy | Meas.    | M/z      | Calc.     | MH+    | Int.    | Dev. (Da) | Dev. (ppm) | Range               | P                                                                     | Sequence |
|----------------|----------|----------|-----------|--------|---------|-----------|------------|---------------------|-----------------------------------------------------------------------|----------|
| peak 4         | 849.395  | 849.413  | 18088.978 | -0.019 | -22.634 | 193 - 199 | 0          | SLMVDER             |                                                                       |          |
| peak 5         | 865.394  | 865.408  | 15564.253 | -0.015 | -17.488 | 193 - 199 | 0          | SLMVDER             | 3: Oxidation (M)                                                      |          |
| peak 8         | 1045.551 | 1045.473 | 4277.279  | 0.077  | 73.872  | 184 - 192 | 0          | VHMNDNSTK           |                                                                       |          |
| peak 9         | 1061.465 | 1061.468 | 818.171   | -0.004 | -3.544  | 184 - 192 | 0          | VHMNDNSTK           | 3: Oxidation (M)                                                      |          |
| peak 11        | 1092.561 | 1092.557 | 25145.949 | 0.003  | 2.849   | 204 - 212 | 0          | DVLDNLFEEK          |                                                                       |          |
| peak 23        | 1317.698 | 1317.694 | 5150.648  | 0.003  | 2.226   | 193 - 203 | 1          | SLMVDERQLAR         |                                                                       |          |
| peak 27        | 1333.702 | 1333.689 | 6696.586  | 0.012  | 9.016   | 193 - 203 | 1          | SLMVDERQLAR         | 3: Oxidation (M)                                                      |          |
| peak 29        | 1478.787 | 1478.774 | 4353.589  | 0.013  | 8.509   | 252 - 263 | 1          | DTENKILFLEKE        |                                                                       |          |
| peak 30        | 1560.842 | 1560.838 | 478.614   | 0.003  | 2.080   | 200 - 212 | 1          | QLARDVLDNLFEEK      |                                                                       |          |
| peak 69        | 2913.256 | 2913.264 | 190.352   | -0.009 | -3.017  | 213 - 234 | 0          | THCDNVWCLYEIPELQIER | 3: Carbamidomethyl (C) 5: Carbamidomethyl (C) 10: Carbamidomethyl (C) |          |

**B****Sequence data:**

RIAM150-502

Intensity Coverage: 59.1 % (146360 cnts)  
Sequence Coverage MS/MS: 0.0%Sequence Coverage MS: 46.8%  
pI (isoelectric point): 9.3

|            |            |            |             |            |            |            |            |            |            |            |
|------------|------------|------------|-------------|------------|------------|------------|------------|------------|------------|------------|
| 10         | 20         | 30         | 40          | 50         | 60         | 70         | 80         | 90         | 100        | 110        |
| GAMGSQEEEE | AQAKADKIKL | ALEKLEKAV  | KKLVVYVHMND | DNSTKSLMVD | ERQLARDVLD | NLFKETHCD  | NVDWCLYEIY | PELQIERFFE | DHENVEVLS  | DWTRDTENKI |
| 120        | 130        | 140        | 150         | 160        | 170        | 180        | 190        | 200        | 210        | 220        |
| LFLEREKEYA | VFKNPQNFYL | DNRGKESKE  | TNEKHNNAKVK | ESLLEESFCG | TSIIVPELEG | ALYLKEDGKK | SWKRRYFLLR | ASGIYYVFKG | KTKTSRDLAC | FIQFENVNIY |
| 230        | 240        | 250        | 260         | 270        | 280        | 290        | 300        | 310        | 320        | 330        |
| YGTQHKMKYK | APTDCYFVLK | HPQIQKESQY | IKYLCDDTR   | TLNQWVMGIR | IARYGKTLVD | NYQRAVAKAG | LASRWTLNLT | VNAAAPAQPS | TGPRGTGTQP | NGQIPQATHS |
| 340        | 350        | 360        |             |            |            |            |            |            |            |            |
| VSAVLQEAQR | HAETSKDKKP | ALGNHHD    |             |            |            |            |            |            |            |            |

MW:41439.911

GAMGSQEEEAQAKADKIKLLEKLEKAVKKLVVYVHMNDNSTKSLMVDERQLARDVLDNLFKETHCDNVWCLYEIPELQIERFFEDHENVEVLSDWTRDTENKILFLEKKEYAVFKNPQNFYLDNRGKESKETNEKHNNAKVKESLLEESFCGTSIIVPELEGALYKEDGKSWKRRYFLLRASGIYYVFKGKTKTSRDLACFIQFENVNIYYGTQHKMKYKAPTDCYFVLKHPQIQKESQYIKYLCDDTRTLNQWVMGIRIARYGKTLVDNYQRAVAKAGLASRWTLNLTGVNAAAPAQPSGTGKPTGTQFNGQIPQATHSVSAVLQEAQRHAETSKDKKPKALGNHHD

Mass Search Matches

Search Parameter: MS Tol.:50.000000 ppm, MSMS Tol.:0.600000 Da, Trypsin Specific cleavages only Sequence Editor

Modifications: Optional: Oxidation (M)

| Tree hierarchy | Meas.    | M/z      | Calc.     | MH+    | Int.    | Dev. (Da) | Dev. (ppm) | Range                    | P                                                                     | Sequence |
|----------------|----------|----------|-----------|--------|---------|-----------|------------|--------------------------|-----------------------------------------------------------------------|----------|
| peak 1         | 711.386  | 711.419  | 12287.710 | -0.034 | -47.221 | 186 - 190 | 0          | YFLLR                    |                                                                       |          |
| peak 2         | 762.454  | 762.476  | 179.642   | -0.023 | -29.846 | 110 - 115 | 0          | ILFLEK                   |                                                                       |          |
| peak 7         | 849.396  | 849.413  | 198.565   | -0.018 | -21.456 | 46 - 52   | 0          | SLMVDER                  |                                                                       |          |
| peak 9         | 867.506  | 867.520  | 9502.426  | -0.015 | -16.915 | 185 - 190 | 1          | RYFLLR                   |                                                                       |          |
| peak 10        | 997.530  | 997.535  | 609.639   | -0.006 | -6.053  | 191 - 199 | 0          | ASGIYYVFK                |                                                                       |          |
| peak 20        | 1072.495 | 1072.506 | 42404.080 | -0.011 | -9.821  | 277 - 284 | 0          | TYLDNYQR                 |                                                                       |          |
| peak 21        | 1092.543 | 1092.557 | 676.713   | -0.015 | -13.641 | 57 - 65   | 0          | DVLDNLFEEK               |                                                                       |          |
| peak 22        | 1102.414 | 1102.429 | 3242.324  | -0.016 | -14.462 | 253 - 260 | 0          | YLCDDTR                  | 3: Carbamidomethyl (C) 4: Carbamidomethyl (C)                         |          |
| peak 25        | 1148.640 | 1148.656 | 224.069   | -0.017 | -14.705 | 110 - 118 | 1          | ILFLEK                   |                                                                       |          |
| peak 36        | 1217.630 | 1217.646 | 7207.119  | -0.017 | -13.695 | 261 - 270 | 0          | TLNQWVMGIR               |                                                                       |          |
| peak 39        | 1233.627 | 1233.641 | 9240.332  | -0.015 | -11.826 | 261 - 270 | 0          | TLNQWVMGIR               | 7: Oxidation (M)                                                      |          |
| peak 44        | 1280.590 | 1280.602 | 53551.049 | -0.013 | -9.807  | 124 - 133 | 0          | NPQNFYLDNR               |                                                                       |          |
| peak 50        | 1420.655 | 1420.686 | 171.798   | -0.031 | -22.032 | 274 - 284 | 1          | YKTLVDNYQR               |                                                                       |          |
| peak 54        | 1504.730 | 1504.750 | 2910.046  | -0.021 | -14.090 | 229 - 240 | 1          | YKAPTDCYFVLK             | 8: Carbamidomethyl (C)                                                |          |
| peak 67        | 1907.790 | 1907.859 | 799.815   | -0.068 | -35.823 | 37 - 52   | 1          | VHMNDNSTKSLMVDER         | 3: Oxidation (M) 12: Oxidation (M)                                    |          |
| peak 95        | 2460.131 | 2460.165 | 1950.580  | -0.035 | -14.225 | 207 - 226 | 0          | DLACFIQFENVNIYYGTQHK     | 4: Carbamidomethyl (C)                                                |          |
| peak 97        | 2797.357 | 2797.422 | 112.739   | -0.065 | -23.356 | 151 - 175 | 0          | ESLLEESFCGTSIIVPELEGALYK | 9: Carbamidomethyl (C)                                                |          |
| peak 101       | 2913.216 | 2913.264 | 1091.337  | -0.049 | -16.752 | 66 - 87   | 0          | THCDNVWCLYEIPELQIER      | 3: Carbamidomethyl (C) 5: Carbamidomethyl (C) 10: Carbamidomethyl (C) |          |
